# Supplementary material for: Self-assembly of high-nuclear core–shell polyoxovanadates with Lindqvsit templates
Source: Royal Society of Chemistry journal article supplement (doi:10.1039/d4qi02884h), 2024-12-23
Supplement: d4qi02884h1.pdf [file d4qi02884h1.pdf]

## Supporting Information

### **Self-assembly of high-nuclear core-shell polyoxovanadates with Lindqvist templates**

Shuangxue Wu,<sup>a</sup> Yaomei Fu,<sup>b</sup> Hongmei Gan,<sup>a</sup> Liang Zhao,<sup>\*a</sup> Xinlong Wang,<sup>a</sup> Chao Qin<sup>\*a</sup> and Zhongmin Su<sup>c</sup>

<sup>a</sup>Key Laboratory of Polyoxometalate and Reticular Material Chemistry of Ministry of Education, Northeast Normal University, Changchun, Jilin 130024.

<sup>b</sup>Shandong Peninsula Engineering Research Center of Comprehensive Brine Utilization, Weifang University of Science and Technology, Shouguang 262700, China.

<sup>c</sup>Key Laboratory of Advanced Materials of Tropical Island Resources, Hainan University, Haikou 570228, China.

\*Corresponding Authors: [zhaol352@nenu.edu.cn](mailto:zhaol352@nenu.edu.cn); [qinc703@nenu.edu.cn](mailto:qinc703@nenu.edu.cn)

## Experimental Procedures

### Materials and methods

VOSO<sub>4</sub>·xH<sub>2</sub>O, Na<sub>2</sub>WO<sub>4</sub>·4H<sub>2</sub>O, Na<sub>2</sub>MoO<sub>4</sub>·6H<sub>2</sub>O, Bi(NO<sub>3</sub>)<sub>3</sub>·6H<sub>2</sub>O, Cu(NO<sub>3</sub>)<sub>2</sub>·6H<sub>2</sub>O, Phenylphosphonic acid, and sulfur oxide were purchased from Aladdin commercial companies. Acetonitrile, methanol, N, N-Dimethylformamide, ethylenediamine, and 30% H<sub>2</sub>O<sub>2</sub> were obtained from Tianjin Fuyu Fine Chemical Co., Ltd., and all commercial reagents and solvents were used without further purification.

Single-crystal X-ray diffraction data for the **1** and **2** were recorded using a Germany Bruker D8 VENTURE diffractometer with graphite-monochromated Cu K $\alpha$  radiation ( $\lambda = 0.15406$  nm) at 298.02 K. SADABS software was used for multiscan absorption corrections. The crystal structures were solved via the direct method and refined using full-matrix methods against  $F^2$  from the SHELXTL package and Olex 2 software. Anisotropic refinement was performed for all non-hydrogen atoms. The restrained DFIX, SIMU, ISOR instructions were used to make the structures more reasonable. The solvent molecules and counterions in **1** and **2** are disordered, hindering the modeling of the crystal structure. Therefore, all guest molecules and counterions in **1** and **2** were removed using the SQUEEZE option of PLATON. The specific crystallographic data and structure refinement results of the compound **1** and **2** are shown in Table S1. Crystallographic data from **1** and **2** were delivered to the Cambridge Crystallographic Data Centre (CCDC) and assigned No. 2401866 and 2401867.

Powder X-ray diffraction (PXRD) patterns were measured with a Smartlab diffractometer, radiating through Cu K $\alpha$  ( $\lambda = 0.15418$  nm) in the range 5°–50° at a rate of 10° min<sup>-1</sup>. Thermogravimetric analysis was measured with a Japan DTG-60H thermogravimetric differential thermal analyzer under a nitrogen atmosphere, heated at a rate of 10° min<sup>-1</sup> from room temperature to 4000 °C. Infrared spectra were measured using the KBr press method on a Cary 7000 FT/IR spectrophotometer in the range of 4000–400 cm<sup>-1</sup>. X-ray photoelectron spectroscopy (XPS) was carried out using an XPS system (Thermo-Fisher, ESCLAB 250, USA).

## Results and Discussion

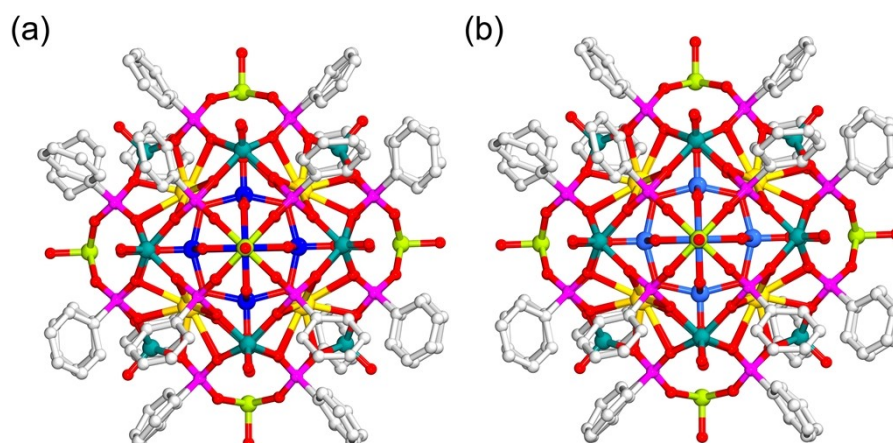

**Figure S1.** (a) and (b) Ball-and-stick modeling compounds **1** and **2**, respectively. Color code: red, O; pink, P; yellow, Na; green, V; blue, W; light blue, Mo. H atoms are omitted for clarity.

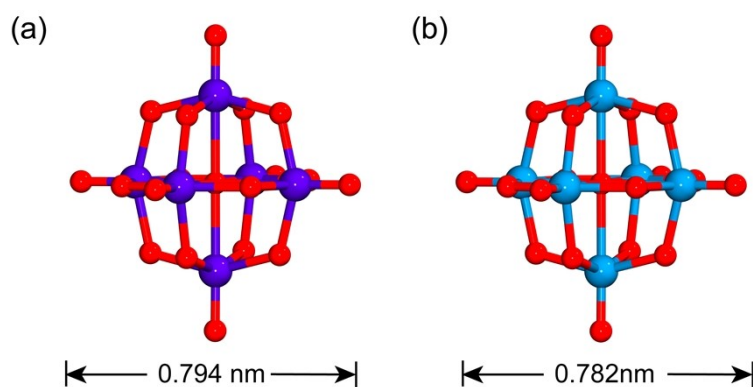

**Figure S2.** Ball-and-stick modeling of  $\{W_6O_{19}\}^{2-}$  and  $\{Mo_6O_{19}\}^{2-}$

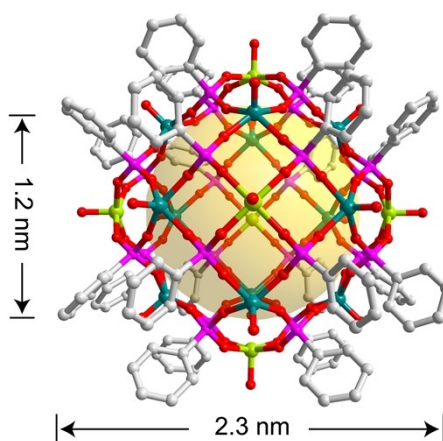

**Figure S3.** Ball-and-stick model for shell  $\{V_6V^{IV}_{12}O_{18}(PhPO_3)_{24}\}^{6-}$ . Color code: red, O; pink, P; green, V. H atoms are omitted for clarity.

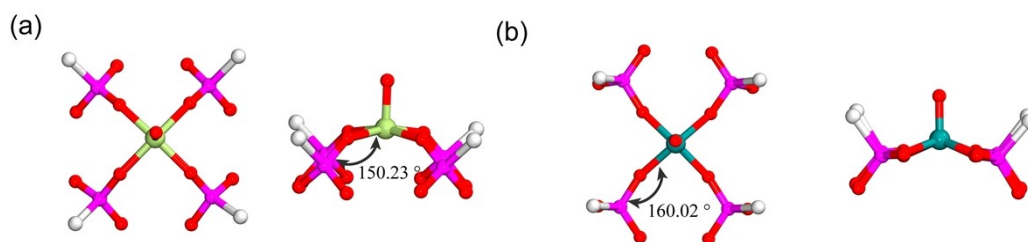

**Figure S4.** (a) and (b) Top and main views of the square pyramids  $\{VVO_5(PhPO_3)_4\}$  and  $\{V^{IV}O_5(PhPO_3)_4\}$ , respectively.

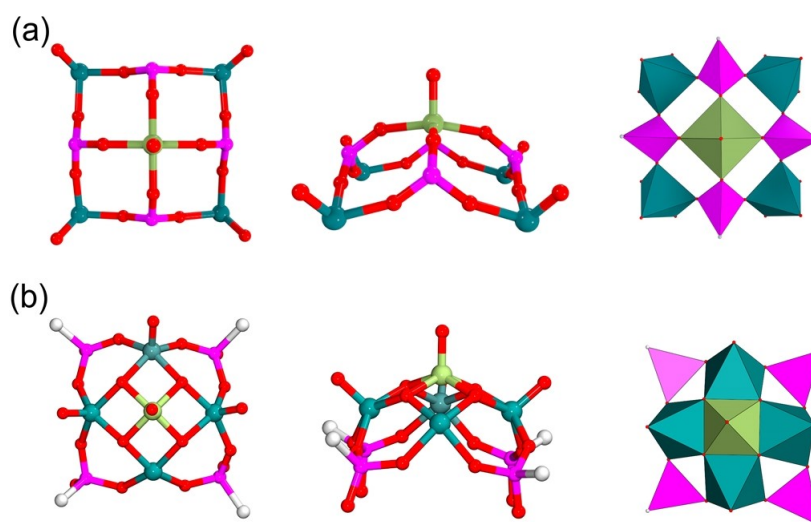

**Figure S5.** (a) and (b) Ball-and-stick models and polyhedral diagrams of  $\{V^V V^{IV}_4(PhPO_3)_4\}$  and  $\{V_5P_4\}$ , respectively.

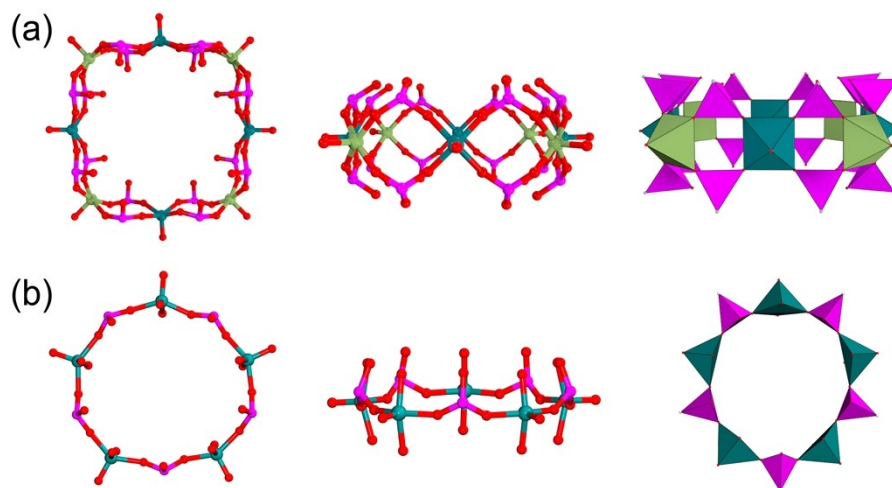

**Figure S6.** (a) and (b) Ball-and-stick models and polyhedral diagrams of  $\{V^V_4 V^{IV}_4(PhPO_3)_{16}\}$  and  $\{VVO_5(PhPO_3)_4\}$ , respectively.

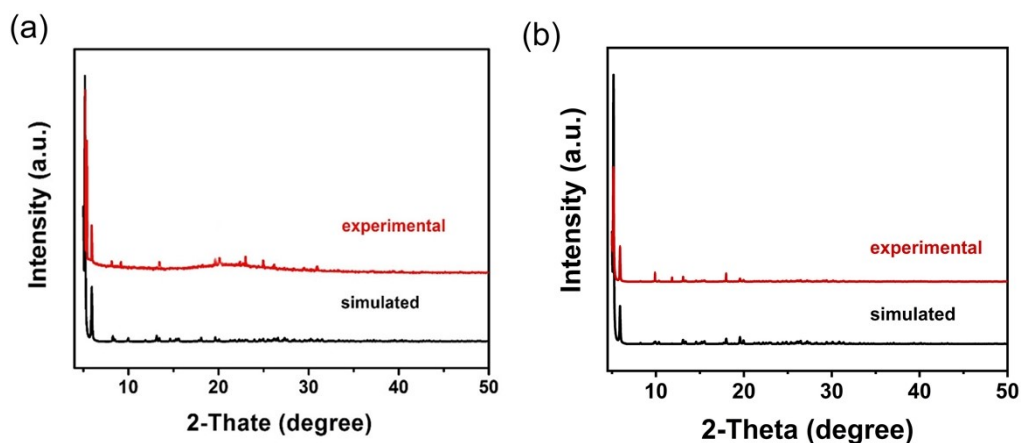

Figure S7. (a) and (b) Experimental and simulated powder X-ray diffraction patterns for compounds **1** and **2**, respectively.

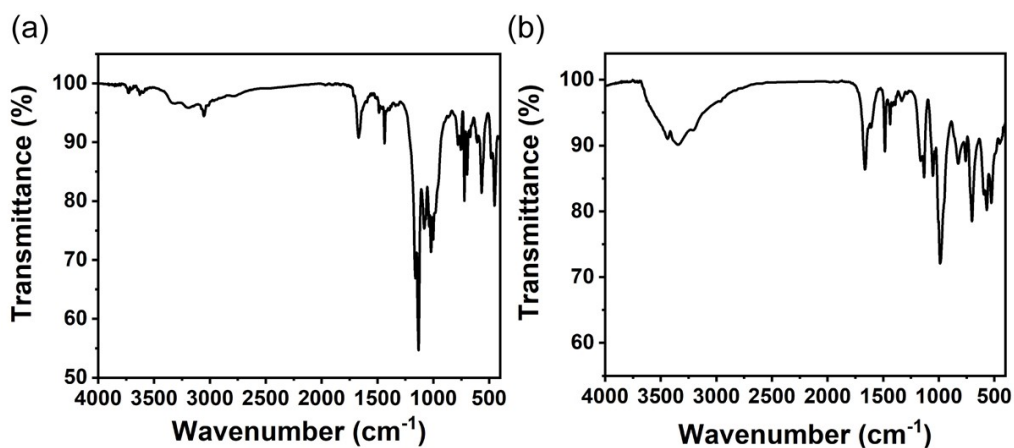

Figure S8. (a) and (b) Fourier transform infrared (FTIR) spectra of compounds **1** and **2**, respectively.

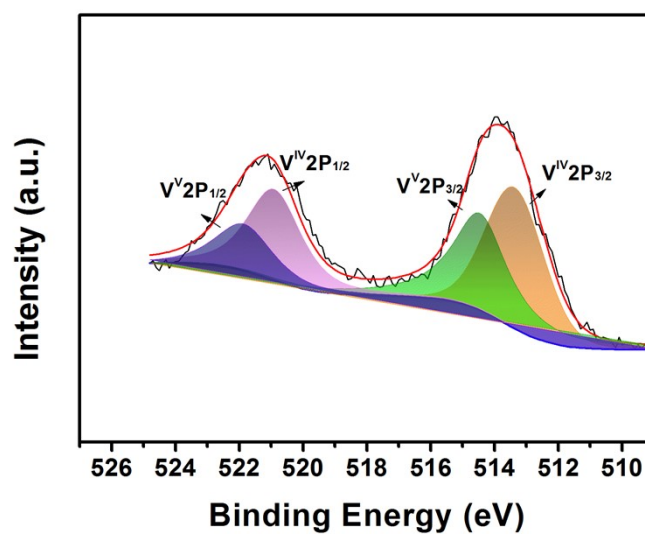

Figure S9. XPS spectra of compound **1** for V  $2p_{3/2}$  and V  $2p_{1/2}$ .

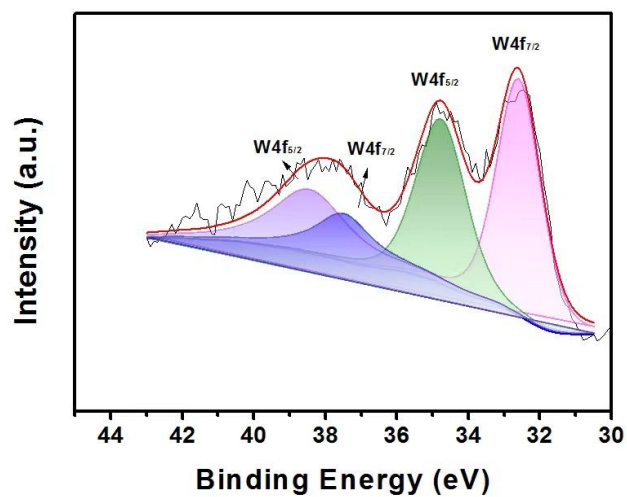

Figure S10. XPS spectra of compound 1 for W 4f<sub>5/2</sub> and W 4f<sub>7/2</sub>.

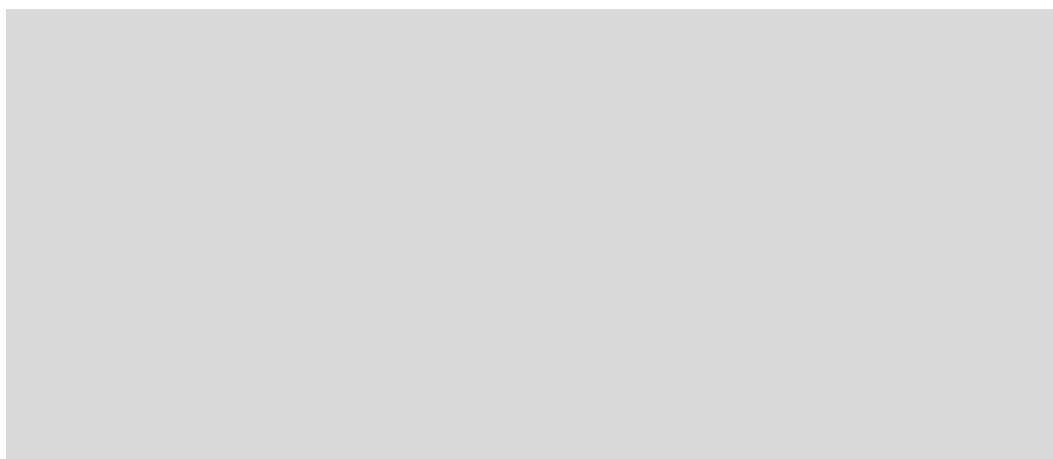

Figure S11. (a) and (b) Thermogravimetric analytical traces of compounds 1 and 2, respectively.

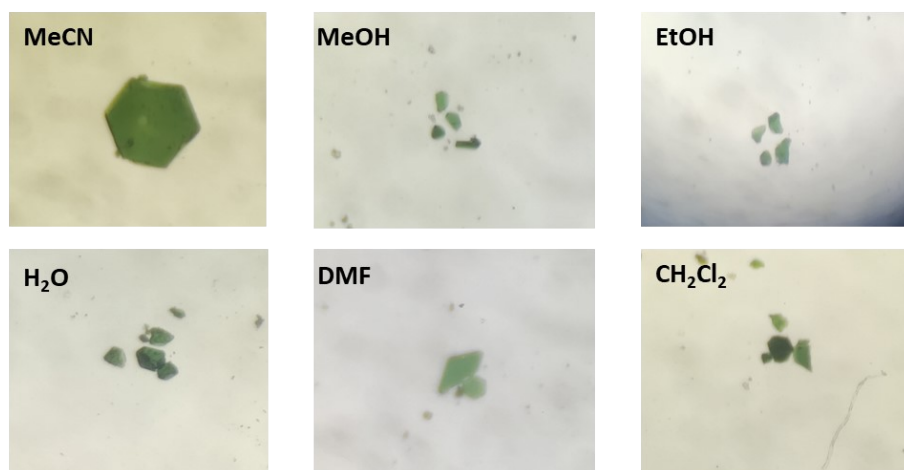

Figure S12. Photograph of crystal 1 after 3 days of immersion in different solvents.

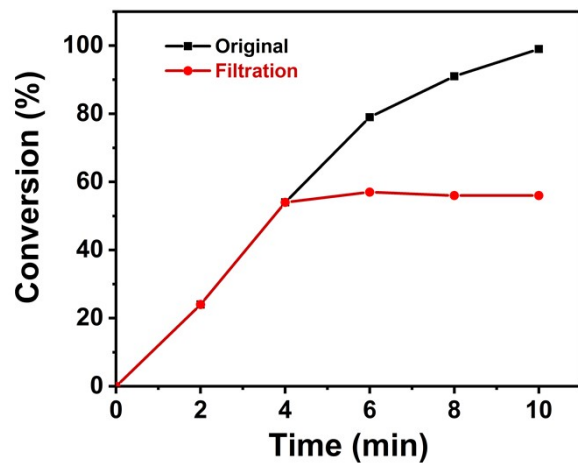

Fig. S13 Dynamic conversion curve of methyl phenyl sulfide catalyzed by compound **1** (black), and the catalyst was filtered out at 4 min of the reaction (red).

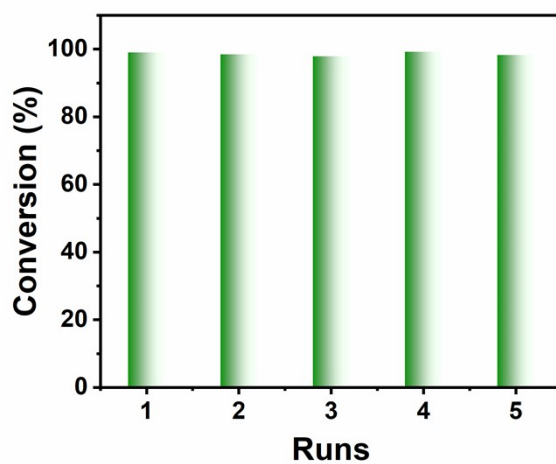

Fig. S14 Circular experimental diagram of methyl phenyl sulfide catalyzed by compound **1**.

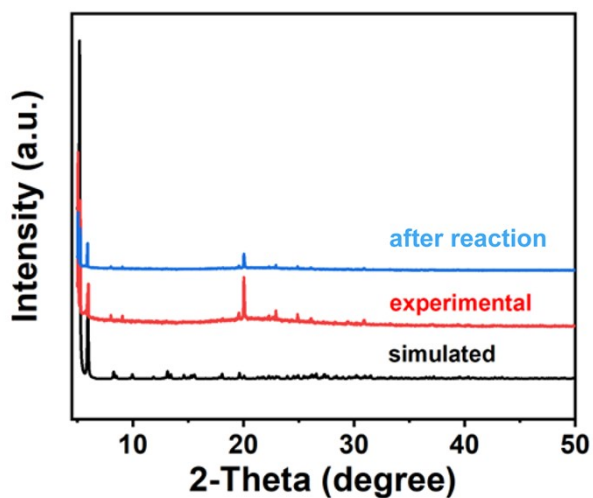

Fig. S15 The PXRD patterns for **1**: simulated (black), experimental (red), after recycle (blue).

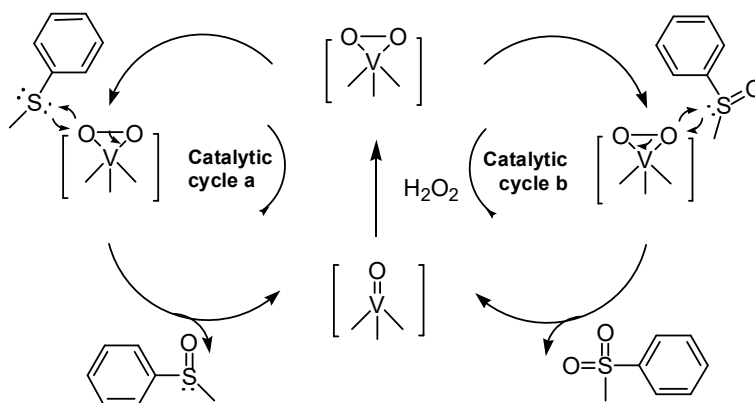

**Figure S16.** Possible mechanism for the catalysis of methyl phenyl sulphide (MBT) by compound **1**. We conducted a control experiment utilizing phenylphosphonic acid and  $[\text{W}_6\text{O}_{19}]^{2-}$ , which exhibited a minimal catalytic influence on MBT, indicating that vanadate serves as the primary active species. Based on the reported literature related to the catalytic oxidation of  $\text{POVs}^{1-8}$ , we propose a possible mechanism for the catalytic oxidation of MBT by compound **1**. The V atom in the  $\{\text{VO}_5\}$  moiety of compound **1** was oxidised by  $\text{H}_2\text{O}_2$  to vanadium peroxide, which was subsequently attacked by the S atom in MBT to give the sulfoxide. The sulfoxide is further attacked nucleophilically by vanadium peroxide to give the final product sulfone.

**Table S1.** Crystallographic data for compounds **1** and **2**

| Compound                                  | <b>1</b>                                                                                    | <b>2</b>                                                                                     |
|-------------------------------------------|---------------------------------------------------------------------------------------------|----------------------------------------------------------------------------------------------|
| Empirical formula                         | $\text{C}_{144}\text{H}_{120}\text{Na}_8\text{O}_{109}\text{P}_{24}\text{V}_{18}\text{W}_6$ | $\text{C}_{144}\text{H}_{120}\text{Na}_8\text{O}_{109}\text{P}_{24}\text{V}_{18}\text{Mo}_6$ |
| Formula weight                            | 6919.2                                                                                      | 5992.4                                                                                       |
| Temperature/K                             | 284.28                                                                                      | 293(2)                                                                                       |
| Crystal system                            | trigonal                                                                                    | trigonal                                                                                     |
| Space group                               | $R\bar{3}$                                                                                  | $R\bar{3}$                                                                                   |
| $a/\text{\AA}$                            | 20.772(4)                                                                                   | 20.8705(5)                                                                                   |
| $b/\text{\AA}$                            | 20.772(4)                                                                                   | 20.8705(5)                                                                                   |
| $c/\text{\AA}$                            | 53.061(19)                                                                                  | 53.328(3)                                                                                    |
| $\alpha/^\circ$                           | 90                                                                                          | 90                                                                                           |
| $\beta/^\circ$                            | 90                                                                                          | 90                                                                                           |
| $\gamma/^\circ$                           | 120                                                                                         | 120                                                                                          |
| Volume/ $\text{\AA}^3$                    | 19827(10)                                                                                   | 20116.5(14)                                                                                  |
| $Z$                                       | 3                                                                                           | 3                                                                                            |
| $\rho_{\text{calc}}/\text{cm}^3$          | 1.664                                                                                       | 1.564                                                                                        |
| $F(000)$                                  | 9486.0                                                                                      | 9165.0                                                                                       |
| Reflections collected                     | 32591                                                                                       | 21350                                                                                        |
| Independent reflections                   | 7360                                                                                        | 4684                                                                                         |
| $R_{\text{int}}$                          | 0.0338                                                                                      | 0.0417                                                                                       |
| Goodness-of-fit on $F^2$                  | 1.087                                                                                       | 1.072                                                                                        |
| Final $R$ indexes [ $I \geq 2\sigma(I)$ ] | $R_1 = 0.1257$ , $wR_2 = 0.2834$                                                            | $R_1 = 0.0748$ , $wR_2 = 0.2078$                                                             |
| Final $R$ indexes [all data]              | $R_1 = 0.1315$ , $wR_2 = 0.2861$                                                            | $R_1 = 0.0868$ , $wR_2 = 0.2168$                                                             |

$$R_1 = \frac{\sum |F_o| - |F_c|}{\sum |F_o|}, wR_2 = \frac{[\sum w(F_o^2 - F_c^2)^2 / \sum w(F_o^2)^2]^{1/2}}$$



**Table S2.** Bond lengths for compound **1**.

| Atom | Atom             | Length/Å   | Atom | Atom            | Length/Å  |
|------|------------------|------------|------|-----------------|-----------|
| W1   | O1               | 2.3235(10) | O1   | W2 <sup>5</sup> | 2.351(9)  |
| W1   | O2               | 1.586(13)  | O1   | W2 <sup>2</sup> | 2.351(9)  |
| C19b | C20              | 1.35(11)   | O1   | W2 <sup>4</sup> | 2.351(9)  |
| C21b | C22              | 1.38(11)   | O1   | W2              | 2.351(9)  |
| C22b | C23              | 1.392(18)  | O1   | W2 <sup>3</sup> | 2.351(9)  |
| C19b | C23              | 1.392(18)  | O1   | W2 <sup>1</sup> | 2.351(9)  |
| C24a | C25              | 1.39       | O2   | W2              | 1.971(16) |
| C20b | C26              | 1.390(18)  | O3   | Na1             | 2.486(18) |
| C25a | C26              | 1.39       | O5   | Na2             | 2.73(2)   |
| C21b | C26              | 1.390(18)  | O6   | V1 <sup>2</sup> | 1.952(16) |
| C27a | C28              | 1.39       | O6   | Na1             | 2.58(2)   |
| W1   | O18 <sup>1</sup> | 1.931(11)  | O7   | Na1             | 2.65(2)   |
| W1   | O18              | 1.921(11)  | O8   | Na1             | 2.56(2)   |
| W1   | O19 <sup>2</sup> | 1.929(11)  | O10  | V2 <sup>1</sup> | 1.943(16) |
| W1   | O19              | 1.943(11)  | O10  | Na2             | 2.65(2)   |
| W1   | Na1 <sup>3</sup> | 3.552(8)   | O11  | V3 <sup>4</sup> | 2.09(2)   |
| W1   | Na1              | 3.537(7)   | O13  | V1 <sup>2</sup> | 1.893(15) |
| W1   | Na2              | 3.542(12)  | O13  | Na1             | 2.75(2)   |
| W1   | W2               | 0.935(9)   | C1   | C2              | 1.42(3)   |
| W1   | W2 <sup>3</sup>  | 2.900(9)   | C1   | C10             | 1.33(3)   |
| W1   | W2 <sup>4</sup>  | 2.731(9)   | O14  | V3 <sup>3</sup> | 1.935(19) |
| V1   | O3               | 2.07(2)    | O16  | Na1             | 2.62(2)   |
| V1   | O6 <sup>3</sup>  | 1.952(16)  | C2   | C11             | 1.42(3)   |
| V1   | O8               | 1.921(15)  | C3   | C4              | 1.39      |
| V1   | O9               | 1.606(14)  | C3   | C8              | 1.39      |
| V1   | O13 <sup>3</sup> | 1.893(15)  | C4   | C5              | 1.39      |
| V1   | Na1              | 3.498(9)   | C5   | C6              | 1.39      |
| V1   | Na1 <sup>3</sup> | 3.582(8)   | C6   | C7              | 1.39      |
| V2   | O5               | 1.904(19)  | C7   | C8              | 1.39      |
| V2   | O7               | 1.937(16)  | C9   | C11             | 1.31(3)   |
| V2   | O10 <sup>4</sup> | 1.943(16)  | C9   | C18             | 1.31(3)   |
| V2   | O12              | 1.544(15)  | C10  | C18             | 1.46(3)   |
| V2   | O16              | 1.942(19)  | C12  | C13             | 1.39      |
| V2   | Na1              | 3.586(9)   | C12  | C17             | 1.39      |
| V2   | Na2              | 3.574(4)   | C13  | C14             | 1.39      |
| V3   | O4               | 1.625(13)  | C14  | C15             | 1.39      |
| V3   | O11 <sup>1</sup> | 2.09(2)    | C15  | C16             | 1.39      |
| V3   | O14 <sup>2</sup> | 1.935(19)  | C16  | C17             | 1.39      |
| V3   | O15              | 1.89(2)    | C23  | C24             | 1.39      |
| V3   | O17              | 1.94(2)    | C23  | C28             | 1.39      |
| P1   | O3               | 1.36(2)    | C26  | C27             | 1.39      |

|    |                 |            |   |     |                  |           |
|----|-----------------|------------|---|-----|------------------|-----------|
| P1 | O13             | 1.493(16)  |   | O18 | W1 <sup>4</sup>  | 1.932(11) |
| P1 | C1              | 1.79(2)    |   | O18 | Na1 <sup>4</sup> | 2.641(13) |
| P1 | O14             | 1.424(19)  |   | O18 | Na2              | 2.680(16) |
| P1 | Na1             | 3.219(9)   |   | O18 | W2 <sup>4</sup>  | 1.274(15) |
| P2 | O8              | 1.496(17)  |   | O19 | W1 <sup>3</sup>  | 1.929(11) |
| P2 | O11             | 1.34(2)    |   | O19 | Na1 <sup>4</sup> | 2.687(14) |
| P2 | O16             | 1.47(2)    |   | O19 | Na1 <sup>3</sup> | 2.632(14) |
| P2 | C12             | 1.774(12)  |   | O19 | W2 <sup>3</sup>  | 1.555(14) |
| P2 | Na1             | 3.215(9)   |   | Na1 | O18 <sup>1</sup> | 2.641(13) |
| P3 | O6              | 1.449(16)  |   | Na1 | O19 <sup>2</sup> | 2.632(14) |
| P3 | O7              | 1.463(18)  |   | Na1 | O19 <sup>1</sup> | 2.687(14) |
| P3 | C3              | 1.800(11)  |   | Na1 | W2               | 2.653(12) |
| P3 | O17             | 1.43(2)    |   | Na2 | P4 <sup>4</sup>  | 3.220(8)  |
| P3 | Na1             | 3.203(9)   |   | Na2 | P4 <sup>1</sup>  | 3.220(8)  |
| P4 | O5              | 1.470(19)  |   | Na2 | O5 <sup>1</sup>  | 2.73(2)   |
| P4 | O10             | 1.434(17)  |   | Na2 | O5 <sup>4</sup>  | 2.73(2)   |
| P4 | O15             | 1.46(2)    |   | Na2 | O10 <sup>1</sup> | 2.65(2)   |
| P4 | C23             | 1.781(16)  |   | Na2 | O10 <sup>4</sup> | 2.65(2)   |
| P4 | Na2             | 3.220(8)   |   | Na2 | O18 <sup>1</sup> | 2.680(16) |
| O1 | W1 <sup>5</sup> | 2.3233(10) |   | Na2 | O18 <sup>4</sup> | 2.680(16) |
| O1 | W1 <sup>3</sup> | 2.3232(10) |   | W2  | W1 <sup>1</sup>  | 2.731(9)  |
| O1 | W1 <sup>4</sup> | 2.3233(10) |   | W2  | W1 <sup>2</sup>  | 2.900(9)  |
| O1 | W1 <sup>1</sup> | 2.3233(10) |   | W2  | O18 <sup>1</sup> | 1.273(15) |
| O1 | W1 <sup>2</sup> | 2.3232(10) | □ | W2  | O19 <sup>2</sup> | 1.555(14) |

<sup>1</sup>+Y-X,1-X,+Z; <sup>2</sup>-1/3+Y,1/3-X+Y,4/3-Z; <sup>3</sup>2/3-Y+X,1/3+X,4/3-Z; <sup>4</sup>1-Y,1+X-Y,+Z; <sup>5</sup>2/3-X,4/3-Y,4/3-Z

**Table S3.** Bond lengths for compound **2**.

| Atom | Atom             | Length/Å  | □ | Atom | Atom             | Length/Å  |
|------|------------------|-----------|---|------|------------------|-----------|
| Mo1  | O1               | 2.3380(7) |   | O3   | Na1 <sup>3</sup> | 2.647(9)  |
| Mo1  | O2               | 1.635(10) |   | O3   | Na1              | 2.667(9)  |
| Mo1  | O3               | 1.945(7)  |   | O4   | Mo1 <sup>4</sup> | 1.939(7)  |
| Mo1  | O3 <sup>1</sup>  | 1.938(7)  |   | O4   | Na1 <sup>3</sup> | 2.667(10) |
| Mo1  | O4 <sup>2</sup>  | 1.939(7)  |   | O4   | Na2              | 2.647(11) |
| Mo1  | O4               | 1.946(7)  |   | O5   | Na1              | 2.575(12) |
| C14a | C15              | 1.39      |   | O6   | Na1 <sup>3</sup> | 2.680(12) |
| C15a | C16              | 1.39      |   | O7   | V1 <sup>3</sup>  | 1.941(10) |
| C17a | C18              | 1.39      |   | O7   | Na1 <sup>3</sup> | 2.610(12) |
| Mo1  | Na1 <sup>1</sup> | 3.558(5)  |   | O8   | V1 <sup>4</sup>  | 1.936(10) |
| Mo1  | Na1              | 3.552(5)  |   | O8   | Na1 <sup>3</sup> | 2.581(13) |
| Mo1  | Na1 <sup>3</sup> | 3.541(5)  |   | O9   | V2 <sup>2</sup>  | 1.949(10) |
| Mo1  | Na2              | 3.557(8)  |   | O9   | Na2              | 2.651(13) |
| C25b | C27              | 1.374(15) |   | O11  | Na2              | 2.621(12) |
| C26b | C28              | 1.387(15) |   | O13  | V1 <sup>3</sup>  | 1.932(9)  |

|    |                  |           |     |                  |           |
|----|------------------|-----------|-----|------------------|-----------|
| V1 | O5               | 1.944(9)  | O13 | Na1              | 2.766(15) |
| V1 | O7 <sup>1</sup>  | 1.941(10) | O15 | Na1 <sup>3</sup> | 2.680(15) |
| V1 | O8 <sup>2</sup>  | 1.936(10) | C1  | C6               | 1.390(19) |
| V1 | O10              | 1.572(9)  | C1  | C10              | 1.41(2)   |
| V1 | O13 <sup>1</sup> | 1.932(9)  | C2  | C8               | 1.41(2)   |
| V1 | Na1 <sup>1</sup> | 3.585(5)  | C2  | C22              | 1.37(2)   |
| V1 | Na1              | 3.533(5)  | O18 | V3 <sup>4</sup>  | 1.932(10) |
| V2 | O6               | 1.908(9)  | C3  | C7               | 1.37(2)   |
| V2 | O9 <sup>4</sup>  | 1.949(10) | C3  | C9               | 1.38(2)   |
| V2 | O11              | 1.945(10) | C4  | C5               | 1.38(2)   |
| V2 | O12              | 1.590(9)  | C4  | C6               | 1.358(19) |
| V2 | O15              | 1.925(11) | C5  | C12              | 1.32(2)   |
| V2 | Na1 <sup>3</sup> | 3.602(5)  | C7  | C11              | 1.40(2)   |
| V2 | Na2              | 3.594(3)  | C8  | C19              | 1.35(2)   |
| V3 | O14              | 1.721(9)  | C9  | C23              | 1.36(2)   |
| V3 | O16              | 1.926(10) | C10 | C12              | 1.40(2)   |
| V3 | O17              | 1.915(10) | C11 | C21              | 1.30(2)   |
| V3 | O18 <sup>2</sup> | 1.932(10) | C13 | C14              | 1.39      |
| V3 | O19              | 1.903(10) | C13 | C18              | 1.39      |
| P1 | O5               | 1.477(10) | C13 | C25              | 1.384(15) |
| P1 | O13              | 1.475(10) | C13 | C26              | 1.391(15) |
| P1 | C1               | 1.773(14) | C16 | C17              | 1.39      |
| P1 | O19              | 1.461(11) | C16 | C27              | 1.386(15) |
| P1 | Na1              | 3.262(6)  | C16 | C28              | 1.396(15) |
| P2 | O6               | 1.502(10) | C19 | C20              | 1.29(2)   |
| P2 | O8               | 1.473(10) | C20 | C24              | 1.35(2)   |
| P2 | O18              | 1.449(11) | C21 | C23              | 1.34(2)   |
| P2 | C3               | 1.784(13) | C22 | C24              | 1.41(2)   |
| P2 | Na1 <sup>3</sup> | 3.222(6)  | Na1 | P2 <sup>1</sup>  | 3.222(6)  |
| P3 | O7               | 1.489(9)  | Na1 | P3 <sup>1</sup>  | 3.243(6)  |
| P3 | O15              | 1.489(11) | Na1 | O3 <sup>1</sup>  | 2.647(9)  |
| P3 | O16              | 1.457(10) | Na1 | O4 <sup>1</sup>  | 2.668(10) |
| P3 | C2               | 1.773(15) | Na1 | O6 <sup>1</sup>  | 2.680(12) |
| P3 | Na1 <sup>3</sup> | 3.243(6)  | Na1 | O7 <sup>1</sup>  | 2.610(12) |
| P4 | O9               | 1.483(10) | Na1 | O8 <sup>1</sup>  | 2.581(13) |
| P4 | O11              | 1.480(10) | Na1 | O15 <sup>1</sup> | 2.680(15) |
| P4 | O17              | 1.455(11) | Na2 | P4 <sup>4</sup>  | 3.253(5)  |
| P4 | C13              | 1.786(12) | Na2 | P4 <sup>2</sup>  | 3.253(5)  |
| P4 | Na2              | 3.253(5)  | Na2 | O4 <sup>4</sup>  | 2.647(11) |
| O1 | Mo1 <sup>4</sup> | 2.3379(7) | Na2 | O4 <sup>2</sup>  | 2.647(11) |
| O1 | Mo1 <sup>2</sup> | 2.3379(7) | Na2 | O9 <sup>2</sup>  | 2.651(13) |
| O1 | Mo1 <sup>5</sup> | 2.3380(7) | Na2 | O9 <sup>4</sup>  | 2.651(13) |
| O1 | Mo1 <sup>1</sup> | 2.3380(7) | Na2 | O11 <sup>2</sup> | 2.621(12) |
| O1 | Mo1 <sup>3</sup> | 2.3379(7) | Na2 | O11 <sup>4</sup> | 2.621(12) |

O3                      Mo1<sup>3</sup>                      1.938(7)                      □                      □                      □                      □

<sup>1</sup>-1/3+Y,1/3-X+Y,4/3-Z; <sup>2</sup>+Y-X,1-X,+Z; <sup>3</sup>2/3-Y+X,1/3+X,4/3-Z; <sup>4</sup>1-Y,1+X-Y,+Z; <sup>5</sup>2/3-X,4/3-Y,4/3-Z

**Table S4.** Selected Angles [deg] for Compound 1

| Atom             | Atom | Atom             | Angle/°  | □ | Atom            | Atom | Atom            | Angle/°   |
|------------------|------|------------------|----------|---|-----------------|------|-----------------|-----------|
| O2               | W1   | O18 <sup>3</sup> | 103.9(6) |   | V1              | O8   | Na1             | 101.7(8)  |
| C28a             | C27a | C26              | 120      |   | P2              | O8   | V1              | 156.6(13) |
| C22b             | C21b | C26              | 114(6)   |   | P2              | O8   | Na1             | 101.7(9)  |
| O2               | W1   | O18              | 104.3(6) |   | V2 <sup>3</sup> | O10  | Na2             | 101.0(8)  |
| O2               | W1   | O19 <sup>4</sup> | 102.1(6) |   | P4              | O10  | V2 <sup>3</sup> | 159.1(16) |
| O2               | W1   | O19              | 103.0(6) |   | P4              | O10  | Na2             | 99.7(10)  |
| O2               | W1   | Na1 <sup>1</sup> | 86.3(5)  |   | P2              | O11  | V3 <sup>2</sup> | 147.0(12) |
| O2               | W1   | Na1              | 86.2(5)  |   | V1 <sup>4</sup> | O13  | Na1             | 99.4(8)   |
| O2               | W1   | Na2              | 87.8(5)  |   | P1              | O13  | V1 <sup>4</sup> | 165.1(17) |
| O2               | W1   | W2 <sup>1</sup>  | 127.6(5) |   | P1              | O13  | Na1             | 94.1(9)   |
| O2               | W1   | W2 <sup>2</sup>  | 126.0(5) |   | C2              | C1   | P1              | 119.5(18) |
| O18 <sup>3</sup> | W1   | O1               | 76.3(4)  |   | C10             | C1   | P1              | 123.1(16) |
| O18              | W1   | O1               | 76.5(4)  |   | C10             | C1   | C2              | 117(2)    |
| O18              | W1   | O18 <sup>3</sup> | 88.4(6)  |   | P1              | O14  | V3 <sup>1</sup> | 153.9(13) |
| O18              | W1   | O19 <sup>4</sup> | 153.6(5) |   | P4              | O15  | V3              | 156.4(12) |
| O7               | V2   | O10 <sup>2</sup> | 147.1(8) |   | O8              | Na1  | O6              | 140.9(6)  |
| O7               | V2   | O16              | 80.9(11) | □ | O8              | Na1  | O7              | 107.8(6)  |

**Table S5.** Selected Angles [deg] for Compound 2

| Atom | Atom | Atom             | Angle/°  | □ | Atom            | Atom | Atom             | Angle/°   |
|------|------|------------------|----------|---|-----------------|------|------------------|-----------|
| O1   | Mo1  | Na1 <sup>1</sup> | 92.99(8) |   | P2              | O6   | Na1 <sup>1</sup> | 96.7(5)   |
| C28b | C26b | C13              | 115(3)   |   | V1 <sup>1</sup> | O7   | Na1 <sup>1</sup> | 100.8(4)  |
| O1   | Mo1  | Na1 <sup>2</sup> | 92.56(8) |   | P3              | O7   | V1 <sup>1</sup>  | 158.0(7)  |
| C27b | C25b | C13              | 123(3)   |   | P3              | O7   | Na1 <sup>1</sup> | 101.0(5)  |
| C17a | C18a | C13              | 120      |   | V1 <sup>4</sup> | O8   | Na1 <sup>1</sup> | 104.1(5)  |
| O1   | Mo1  | Na1              | 92.70(9) |   | P2              | O8   | V1 <sup>4</sup>  | 153.1(8)  |
| O1   | Mo1  | Na2              | 92.78(8) |   | P2              | O8   | Na1 <sup>1</sup> | 101.8(6)  |
| O2   | Mo1  | O1               | 179.8(3) |   | V2 <sup>3</sup> | O9   | Na2              | 101.7(5)  |
| O2   | Mo1  | O3 <sup>2</sup>  | 103.4(4) |   | P4              | O9   | V2 <sup>3</sup>  | 158.1(9)  |
| O2   | Mo1  | O3               | 103.2(4) |   | P4              | O9   | Na2              | 100.0(6)  |
| O2   | Mo1  | O4               | 103.3(4) |   | V2              | O11  | Na2              | 102.8(4)  |
| C26b | C28b | C16              | 125(3)   |   | P4              | O11  | V2               | 155.4(8)  |
| O2   | Mo1  | O4 <sup>3</sup>  | 103.5(4) |   | P4              | O11  | Na2              | 101.3(6)  |
| O12  | V2   | O11              | 107.5(5) |   | V1 <sup>1</sup> | O13  | Na1              | 97.9(5)   |
| O12  | V2   | O15              | 106.5(6) |   | P1              | O13  | V1 <sup>1</sup>  | 165.5(11) |
| C25b | C27b | C16              | 118(3)   | □ | P1              | O13  | Na1              | 95.7(6)   |

**Table S6.** The BVS calculations suggest the following central atom valencies for **1**

| Atom | BVS calc. |
|------|-----------|
| W1   | 6.238     |
| V1   | 4.208     |
| V2   | 4.324     |
| V3   | 4.862     |
| P1   | 5.338     |
| P2   | 5.026     |
| P3   | 5.214     |
| P4   | 5.043     |
| Na1  | 1.089     |
| Na2  | 1.238     |

**Table S7.** The BVS calculations suggest the following central atom valencies for **2**

| Atom | BVS calc. |
|------|-----------|
| Mo1  | 5.569     |
| V1   | 4.424     |
| V2   | 4.271     |
| V3   | 4.878     |
| P1   | 5.236     |
| P2   | 5.128     |
| P3   | 5.144     |
| P4   | 4.986     |
| Na1  | 1.248     |
| Na2  | 1.336     |

**Table S8.** Conversion ratio of methyl phenyl sulfide (BMT) under different conditions

| Entry | Catalyst (mmol) | Oxidant                       | Temperature (°C) | Solvent | Time (min) | Conversion (%) |
|-------|-----------------|-------------------------------|------------------|---------|------------|----------------|
| 1     | 0.00125         | TBHP                          | 25               | MeOH    | 10         | 78.63          |
| 2     | 0.00125         | H <sub>2</sub> O <sub>2</sub> | 25               | MeOH    | 10         | >99            |

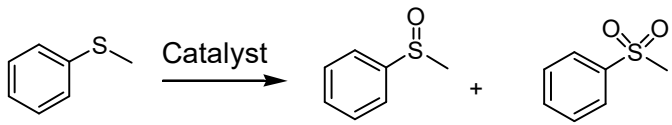

|   |         |                               |    |                                 |    |       |
|---|---------|-------------------------------|----|---------------------------------|----|-------|
| 3 | 0.00125 | H <sub>2</sub> O <sub>2</sub> | 25 | MeCN                            | 10 | 84.35 |
| 4 | 0.00125 | H <sub>2</sub> O <sub>2</sub> | 25 | CH <sub>2</sub> Cl <sub>2</sub> | 10 | 79.47 |
| 5 | 0.00125 | H <sub>2</sub> O <sub>2</sub> | 25 | H <sub>2</sub> O                | 10 | 38.64 |
| 6 | None    | H <sub>2</sub> O <sub>2</sub> | 25 | MeOH                            | 10 | 19.25 |

**Table S9.** Comparison of the conversion performance of similar systems for the catalytic oxidation of methyl phenyl sulfide

| Entry | Catalyst                                                                                                                                                                                                    | Oxidant                       | Tem. (°C) | Time (min) | Con. (%) | Reference |
|-------|-------------------------------------------------------------------------------------------------------------------------------------------------------------------------------------------------------------|-------------------------------|-----------|------------|----------|-----------|
| 1     | {V <sub>20</sub> W <sub>2</sub> P <sub>20</sub> }                                                                                                                                                           | H <sub>2</sub> O <sub>2</sub> | 25        | 30         | >99      | 1         |
| 2     | TBA <sub>2</sub> Mo <sub>6</sub> O <sub>19</sub>                                                                                                                                                            | H <sub>2</sub> O <sub>2</sub> | 25        | 180        | 99       | 2         |
| 3     | Mo <sub>6</sub> O <sub>19</sub> @Pt <sub>6</sub> L <sub>4</sub> (NO <sub>3</sub> ) <sub>10</sub>                                                                                                            | H <sub>2</sub> O <sub>2</sub> | 25        | 180        | <10      | 2         |
| 4     | K <sub>6</sub> H[V <sup>IV</sup> <sub>17</sub> V <sup>IV</sup> <sub>12</sub> (OH) <sub>4</sub> O <sub>60</sub> (OOC(CH <sub>2</sub> ) <sub>4</sub> COO) <sub>8</sub> ] <sub>n</sub> H <sub>2</sub> O        | TBHP                          | 25        | 60         | 98       | 3         |
| 5     | [(C <sub>2</sub> N <sub>2</sub> H <sub>8</sub> ) <sub>4</sub> (CH <sub>3</sub> O) <sub>4</sub> V <sup>IV</sup> <sub>4</sub> V <sup>V</sup> <sub>4</sub> O <sub>16</sub> ] <sub>4</sub> ·4CH <sub>3</sub> OH | TBHP                          | 40        | 240        | 100      | 4         |
| 6     | [Co <sub>2</sub> L <sub>0.5</sub> V <sub>4</sub> O <sub>12</sub> ] <sub>3</sub> ·3DMF·5H <sub>2</sub> O                                                                                                     | TBHP                          | 50        | 240        | >99      | 5         |
| 7     | [V <sup>IV</sup> <sub>8</sub> O <sub>8</sub> (CH <sub>3</sub> O) <sub>16</sub> (C <sub>2</sub> O <sub>4</sub> )](C <sub>6</sub> NH <sub>16</sub> ) <sub>2</sub> (CH <sub>3</sub> OH) <sub>2</sub>           | TBHP                          | 40        | 240        | 100      | 6         |
| 8     | (NH <sub>2</sub> Me <sub>2</sub> ) <sub>12</sub> [(V <sub>5</sub> O <sub>9</sub> Cl) <sub>6</sub> (L) <sub>8</sub> ] <sub>7</sub> ·[MeOH] <sub>7</sub>                                                      | TBHP                          | 25        | 60         | 100      | 7         |
| 9     | [Ni(bix) <sub>2</sub> ]{V <sub>4</sub> O <sub>11</sub> }                                                                                                                                                    | TBHP                          | 25        | 45         | 100      | 8         |

## Reference

- 1 T. Zhang, Y. H. Hou, B. S. Hou, L. Zhao, X. L. Wang, C. Qin and Z. M. Su, High-nuclear polyoxovanadates assembled from pentagonal building blocks, *Chem. Commun.*, 2022, **58**, 11111–11114.
- 2 C. L. Liu, M. A. Moussawi, G. Kalandia, D. E. Salazar Marcano, W. E. Shepard and T. N. Parac-Vogt, Cavity-Directed Synthesis of Labile Polyoxometalates for Catalysis in Confined Spaces, *Angew. Chem. Int. Ed.*, 2024, **63**, e202401940.
- 3 K. Wang, Y. Niu, D. Zhao, Y. Zhao, P. Ma, D. Zhang, J. Wang and J. Niu, The Polyoxovanadate-Based Carboxylate Derivative K<sub>6</sub>H[V<sup>IV</sup><sub>17</sub>V<sup>IV</sup><sub>12</sub>(OH)<sub>4</sub>O<sub>60</sub>(OOC(CH<sub>2</sub>)<sub>4</sub>COO)<sub>8</sub>]<sub>n</sub>H<sub>2</sub>O: Synthesis, Crystal Structure, and Catalysis for Oxidation of Sulfides, *Inorg. Chem.*, 2017, **56**, 14053–14059.
- 4 J. P. Cao, Y. S. Xue, N. F. Li, J. J. Gong, R. K. Kang and Y. Xu, Lewis Acid Dominant Windmill-Shaped V<sub>8</sub> Clusters: A Bifunctional Heterogeneous Catalyst for CO<sub>2</sub> Cycloaddition and Oxidation of Sulfides, *J. Am. Chem. Soc.*, 2019, **141**, 19487–19497.
- 5 B. B. Lu, J. Yang, Y. Y. Liu and J. F. Ma, A Polyoxovanadate–Resorcin [4] arene-Based Porous Metal-Organic Framework as an Efficient Multifunctional Catalyst for the Cycloaddition of CO<sub>2</sub> with Epoxides and the Selective Oxidation of Sulfides, *Inorg. Chem.*, 2017, **56**, 11710–11720.
- 6 Q. D. Ping, J. P. Cao, Y. M. Han, M. X. Yang, Y. L. Hong, J. N. Li, J. L. Wang, J. L. Chen, H. Mei and Y. Xu, Eight-membered ring petal-shaped V<sub>8</sub> cluster: An efficient heterogeneous catalyst for selective sulfur oxidation, *Inorg. Chim. Act.*, 2021, **517**, 120198.
- 7 H. M. Gan, C. Qin, L. Zhao, C. Sun, X. L. Wang and Z. M. Su, Self-Assembled Polyoxometalate-Based Metal-Organic Polyhedra as an Effective Heterogeneous Catalyst for Oxidation of Sulfide, *Cry. Grow. Des.*, 2021, **21**, 1028–1034.
- 8 T. Y. Dang, R. H. Li, H. R. Tian, Q. Wang, Y. Lu and S. X. Liu, Tandem-like vanadium cluster chains in a polyoxovanadate-based metal-organic framework for efficient catalytic oxidation of sulfides, *Inorg. Chem. Front.*, 2021, **8**, 4367–4375.
